# Supplementary material for: Non-covalent ternary systems (DNA-acridine hybrid/DNA/lanthanide(iii)) for efficient and site-selective RNA scission
Source: Royal Society of Chemistry journal article supplement (doi:10.1039/b006772p), 2000-01-01
Supplement: b006772p-1.doc [file b006772p-1.doc]

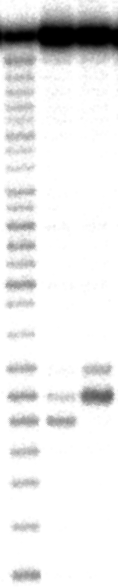

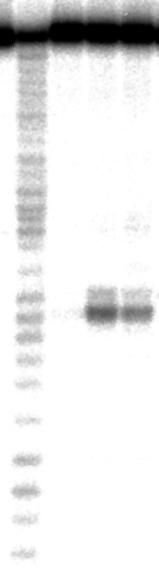


**Supplemental Figure 1.** Selective RNA scission by various systems composed of DNA bearing an acridine, another unmodified DNA, and Lu(III) ion.

**(a) The effect of position of unpaired ribonucleotide.**

Lane 1:

Lane 2:

Note that the scission site is satisfactorily modulated by changing the position of the unpaired ribonucleotide. In a proposed mechanism, the unpaired base partially flips out because of steric repulsion against the bulky intercalator, and the C2’-C3’-O-P dihedral angles and/or the puckering of the ribose residues are accordingly changed.

**(b) Effect of the number of non-pairing ribonucleotides.**

The numbers of unpaired ribonucleotides are zero (lane 1), one (lane 2), and two (lane 3). In lanes 1 and 3, DNA2 (in lane 3 of Figure 2 in the text) is replaced by appropriate DNA oligomers. One or two unpaired ribonucleotides are appropriate for the present site-selective scission. With three of them, the scission becomes less site-selective (data not presented).
