# Supplementary material for: Non-covalent ternary systems (DNA-acridine hybrid/DNA/lanthanide(iii)) for efficient and site-selective RNA scission
Source: Royal Society of Chemistry journal article supplement (doi:10.1039/b006772p), 2000-01-01
Supplement: b006772p-2.doc [file b006772p-2.doc]

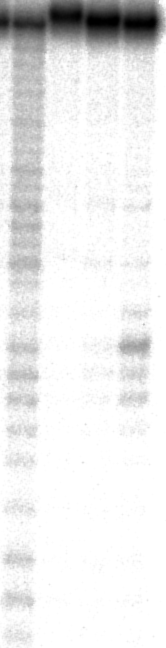


**Supplemental Figure 2.** Effect of bulge formation on the Lu(III)-induced RNA scission.

Lane 1:

Lane 2:

Lane 3:

Note that the scissions took place at several sites. Under the same reaction conditions, the DNA1-Acr/DNA2/Lu(III) ternary system provided much more selective scission (compare this Figure with Supplemental Figure 1 (b)).
